# Supplementary material
Source: Springer Nature journal article supplement (https://www.springermedizin.de/resource/supplementary/13058_2011_2895_MOESM7_ESM.pdf/9702802)

**A**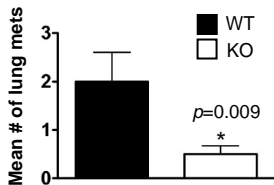**B**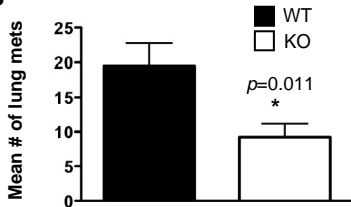**C**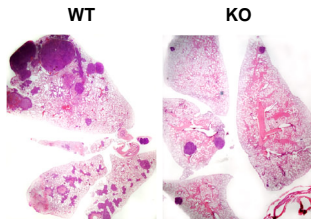**D**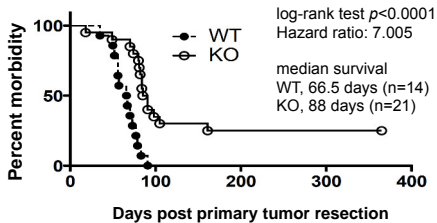

Supplement: MOESM7 [file 9702802]
